# Supplementary material for: Escin inhibits angiogenesis by suppressing interleukin-8 and vascular endothelial growth factor production by blocking nuclear factor-κB activation in pancreatic cancer cell lines
Source: PubMed Central journal article supplement — Oncol Rep. 2021 Mar 9;45(5):55. doi: 10.3892/or.2021.8006 (PMC7962110; doi:10.3892/or.2021.8006), 2021-03-09

Figure S1. Escin reduces TNF- $\alpha$ -induced activation of total NF- $\kappa$ B p65 and p-p65 both in the cytoplasm and the nucleus. p, phosphorylated; TNF, tumor necrosis factor; NF- $\kappa$ B, nuclear factor- $\kappa$ B.

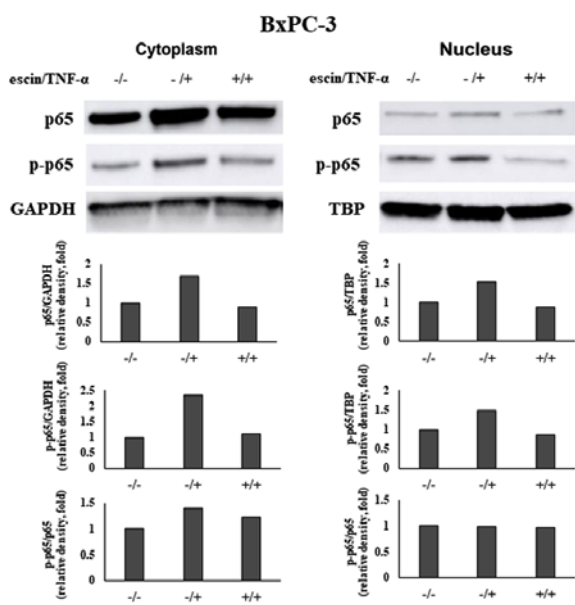

Figure S2. Escin suppresses the TNF- $\alpha$ -induced secretion of IL-8 and VEGF in the AsPC-1 cell line. The concentrations of IL-8 and VEGF in the cell supernatants were measured using ELISA kits. \*P<0.05. VEGF, vascular endothelial growth factor; IL, interleukin.

### AsPC-1

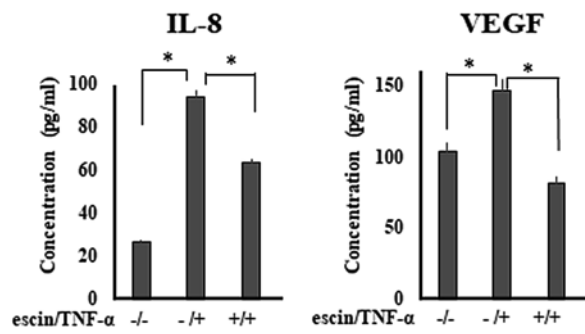

Figure S3. Recombinant IL-8 and VEGF enhances tube formation in the EA.hy 926 cell line. Endotubes were counted under a microscope (x40) and statistically analyzed. \*P<0.05. VEGF, vascular endothelial growth factor; IL, interleukin.

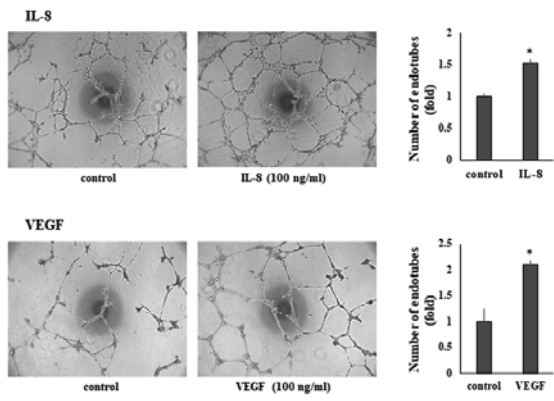

Supplement: Supplementary_Data.pdf [file Supplementary_Data.pdf]
